# Supplementary material for: Microarray-based identification of genes associated with cancer progression and prognosis in hepatocellular carcinoma
Source: PubMed Central journal article supplement (PMC5002170; doi:10.1186/s13046-016-0403-2), 2016-08-27
Supplement: 13046_2016_403_MOESM1_ESM.pdf [file 13046_2016_403_MOESM1_ESM.pdf]

**Discovery of microarray-identified genes correlates with development and prognosis of human hepatocellular carcinomas**

Fuqiang Yin <sup>1,2#</sup>, Lipei Shu <sup>3#</sup>, Xia Liu <sup>4#</sup>, Ting Li <sup>1</sup>, Tao Peng <sup>3</sup>, Yueli Nan <sup>5</sup>, Shu Li <sup>5</sup>, Xiaoyun Zeng <sup>2,5\*</sup>, Xiaoqiang Qiu <sup>5\*</sup>

<sup>1</sup> Medical Scientific Research Centre, Guangxi Medical University, Nanning, Guangxi 530021, P.R. China

<sup>2</sup> Key Laboratory of High-Incidence-Tumor Prevention and Treatment (Guangxi Medical University), Ministry of Education, Nanning, Guangxi 530021, P.R. China

<sup>3</sup> The First Affiliated Hospital, Guangxi Medical University, Nanning, Guangxi 530021, P.R. China

<sup>4</sup> Centre for Translational Medicine, Guangxi Medical University, Nanning, Guangxi 530021, P.R. China

<sup>5</sup> School of Public Health, Guangxi Medical University, Nanning, Guangxi 530021, P.R. China

# Contributed equally to this work

\* Corresponding authors:

Prof. Xiaoyun Zeng, MD, PhD., School of Public Health, Guangxi Medical University, Nanning, Guangxi 530021, P.R. China. E-mail: [zxyxjw@21cn.com](mailto:zxyxjw@21cn.com)

Prof. Xiaoqiang Qiu, MD, PhD., School of Public Health, Guangxi Medical University, 22 Shuangyong Road, Nanning, Guangxi 530021, P.R. China. E-mail: [xqqiu9999@sina.com](mailto:xqqiu9999@sina.com)

Supplementary Table S1. Biological process and cellular component annotation of the 80 genes

associated with HCC development and progression by DAVID online tool

| Most highly enriched |                               | P value  | No. of genes |                                               |
|----------------------|-------------------------------|----------|--------------|-----------------------------------------------|
| Cell                 | Mitotic cell cycle            | 2.09E-06 | 12           | 17 genes in total                             |
| cycle-related        | Cell cycle process            | 2.15E-05 | 13           | ( <i>AURKA</i> , <i>CAP2</i> , <i>CDK1</i> ,  |
| (Biological          | Cell cycle                    | 2.53E-05 | 15           | <i>CDKN3</i> , <i>CKS1B</i> , <i>GMNN</i> ,   |
| processes)           | Cell division                 | 1.10E-04 | 9            | <i>KPNA2</i> , <i>NUSAPI</i> , <i>PRC1</i> ,  |
|                      | Cell cycle phase              | 2.15E-04 | 10           | <i>PSMD4</i> , <i>PTTG1</i> ,                 |
|                      | M phase                       | 2.33E-04 | 9            | <i>RACGAP1</i> , <i>RAD21</i> , <i>TBCE</i> , |
|                      | Chromosome segregation        | 7.26E-04 | 5            | <i>TOP2A</i> , <i>UBE2C</i> ,                 |
|                      | Nuclear division              | 8.16E-04 | 7            | <i>ZWINT</i> )                                |
|                      | Mitosis                       | 8.16E-04 | 7            |                                               |
|                      | Microtubule cytoskeleton      | 8.51E-04 | 6            |                                               |
|                      | organisation                  |          |              |                                               |
|                      | M phase of mitotic cell cycle | 8.97E-04 | 7            |                                               |
|                      | Organelle fission             | 0.001005 | 7            |                                               |
|                      | Spindle organisation          | 0.001482 | 4            |                                               |
|                      | Microtubule-based process     | 0.001675 | 7            |                                               |
|                      | Cytoskeleton organisation     | 0.006138 | 8            |                                               |
|                      | Regulation of cell cycle      | 0.006282 | 7            |                                               |
| Microtubule          | Microtubule cytoskeleton      | 1.73E-04 | 11           | 14 genes in total                             |
| cytoskeleton-        | Spindle                       | 5.35E-04 | 6            | ( <i>AURKA</i> , <i>CCT3</i> , <i>CDK1</i> ,  |

---

|            |                        |          |    |                                                     |
|------------|------------------------|----------|----|-----------------------------------------------------|
| related    | Cytoskeletal component | 0.003506 | 12 | <i>ENAH, FCN2, HSPB1,</i>                           |
| (Cellular  | Spindle microtubule    | 0.007579 | 3  | <i>NDRG2, NUSAPI, PEA15,</i>                        |
| component) | Cytoskeleton           | 0.008458 | 14 | <i>PRC1, PSMB4, RACGAP1,</i><br><i>TBCE, TOP2A)</i> |

---
